# Supplementary material for: Supratentorial CNS-PNETs in children; a Swedish population-based study with molecular re-evaluation and long-term follow-up
Source: PubMed Central journal article supplement (PMC9996973; doi:10.1186/s13148-023-01456-2), 2023-03-09
Supplement: 13148_2023_1456_MOESM1_ESM.pdf [file 13148_2023_1456_MOESM1_ESM.pdf]

**Supplementary table 1. State of the art diagnostic methods for selected tumor types previously diagnosed as CNS PNET**

| Tumor diagnosis                                        | Immunohistochemistry markers                                                                                                                                                                                                                                                                                 | Genetic techniques                                                                                                                                                                                                                                                                                                                      | Other molecular techniques                                                                                         |
|--------------------------------------------------------|--------------------------------------------------------------------------------------------------------------------------------------------------------------------------------------------------------------------------------------------------------------------------------------------------------------|-----------------------------------------------------------------------------------------------------------------------------------------------------------------------------------------------------------------------------------------------------------------------------------------------------------------------------------------|--------------------------------------------------------------------------------------------------------------------|
| Astroblastoma, <i>MN1</i> -altered                     | GFAP positive<br><br>EMA positive<br>OLIG2 at least focally positive                                                                                                                                                                                                                                         | FISH with break-apart <i>MN1</i> probe to detect fusion                                                                                                                                                                                                                                                                                 |                                                                                                                    |
| Atypical teratoid/rhabdoid tumor                       | EMA positive<br><br>Vimentin positive<br><br>SMA and cytokeratin frequently positive<br>Nuclear loss of Ini-1 or Brg1 protein                                                                                                                                                                                | <i>SMARCB1</i> or <i>SMARCA4</i> mutations can be identified by DNA sequencing.<br>Larger deletions can be detected by FISH with specific probes or array-based methods (CGH, MIP)                                                                                                                                                      |                                                                                                                    |
| Choroid Plexus Carcinoma                               | Cytokeratin positive<br><br>EMA positive<br>p53 nuclear accumulation in TP53 mutant cases                                                                                                                                                                                                                    | Detection of chromosomal losses by array-based methods (CGH, MIP)                                                                                                                                                                                                                                                                       |                                                                                                                    |
| CNS neuroblastoma, <i>FOXR2</i> -activated             | OLIG2 positive<br><br>Synaptophysin positive<br><br>TTF-1 frequently positive<br>GFAP negative<br>Vimentin negative                                                                                                                                                                                          | Almost all cases show gain of chromosome 1q, loss of 16q is also frequent.<br><br>Detection by FISH with specific probes or array-based methods (CGH, MIP)                                                                                                                                                                              | Detection of mRNA overexpression of <i>FOXR2</i> and <i>NKX2.1</i> by quantitative RT-PCR or Nanostring technology |
| CNS tumor with <i>BCOR</i> internal tandem duplication | Vimentin positive<br><br>CD56 (NCAM) often positive<br><i>BCOR</i> nuclear positive                                                                                                                                                                                                                          | Internal tandem duplication of <i>BCOR</i> detected by PCR                                                                                                                                                                                                                                                                              |                                                                                                                    |
| Embryonal tumor with multilayered rosettes             | LIN 28 positive<br><br>Vimentin positive<br><br>Synaptophysin positive in neuropil-like matrix                                                                                                                                                                                                               | <i>C19MC</i> amplification detected by FISH or array-based methods (CGH, MIP)<br>For <i>C19MC</i> non-amplified cases, DNA sequencing for <i>DICER1</i> mutations                                                                                                                                                                       |                                                                                                                    |
| Ependymoma <i>ZFTA</i> fusion-positive                 | EMA positive<br><br>Vimentin positive<br><br>Nuclear accumulation of p65-RelA in most cases                                                                                                                                                                                                                  | FISH with break-apart <i>ZFTA</i> probe<br><br>RT-PCR or Nanostring technology to detect <i>ZFTA</i> fusion transcripts                                                                                                                                                                                                                 |                                                                                                                    |
| HGG (different types)                                  | GFAP positive<br><br>OLIG2 positive (all but H3-G34 mutant HGG)<br><br>Vimentin positive<br><br>H3-K27me3 negative and H3K27M mostly positive and in diffuse midline gliomas<br>H3G34R/V positive in hemispheric gliomas with H3-G34 mutation<br>BRAFV600E often positive in anaplastic PXA /epithelioid GBM | DNA (Pyro)sequencing for mutations of H3F3A, other Histone genes, IDH1, IDH2, BRAF (V600)<br>FISH with break-apart probes to detect fusions of <i>NTRK1</i> , -2, -3, <i>ALK</i> , <i>ROS</i> , <i>MET</i> in Infantile hemispheric gliomas. RNA-based methods to detect fusion transcripts<br>(RT-PCR, Nanostring technology, RNA-Seq) |                                                                                                                    |
| Pineoblastoma                                          | OT2 and OTX 3 positive<br>Synaptophysin positive<br>Vimentin negative                                                                                                                                                                                                                                        |                                                                                                                                                                                                                                                                                                                                         |                                                                                                                    |

GFAP, glial fibrillary acidic protein; EMA, epithelial membrane antigen; OLIG2, oligodendrocyte transcription factor 2; SMA, smooth muscle actin; TTF-1, Thyroid transcription factor-1; HGG, high grade glioma
