# Supplementary material for: Supratentorial CNS-PNETs in children; a Swedish population-based study with molecular re-evaluation and long-term follow-up
Source: PubMed Central journal article supplement (PMC9996973; doi:10.1186/s13148-023-01456-2), 2023-03-09
Supplement: 13148_2023_1456_MOESM3_ESM.pdf [file 13148_2023_1456_MOESM3_ESM.pdf]

Supplementary table 2.

| Case ID | Histopathological re-evaluation           | Superfamily                                          |      | Family                                                                  |      | Class                                                                                         |      | Subclass                                                                                    |      |
|---------|-------------------------------------------|------------------------------------------------------|------|-------------------------------------------------------------------------|------|-----------------------------------------------------------------------------------------------|------|---------------------------------------------------------------------------------------------|------|
|         |                                           | Prediction                                           | CS   | Prediction                                                              | CS   | Prediction                                                                                    | CS   | Prediction                                                                                  | CS   |
| 1       | HGG NOS                                   | Adult-type diffuse gliomas                           | 0.85 | Glioblastoma, IDH-wildtype                                              | 0.84 | Glioblastoma, IDH-wildtype, mesenchymal type                                                  | 0.83 | Glioblastoma, IDH-wildtype, mesenchymal subtype                                             | 0.60 |
| 2       | HGG NOS                                   | Low-grade glial/glioneuronal/neuroepithelial tumours | 0.84 | Pilocytic astrocytoma                                                   | 0.56 | Supratentorial midline pilocytic astrocytoma                                                  | 0.46 | Pilocytic astrocytoma, midline                                                              | 0.46 |
| 3       | HGG NOS                                   | Paediatric-type diffuse high-grade gliomas           | 0.84 | Diffuse paediatric-type high-grade glioma, H3-wildtype and IDH-wildtype | 0.83 | Diffuse paediatric-type high grade glioma, rtk2 subtype                                       | 0.59 | Diffuse paediatric-type high grade glioma, rtk2 subtype, subclass b (novel)                 | 0.57 |
| 4       | HGG NOS                                   | Paediatric-type diffuse high-grade gliomas           | 0.66 | Diffuse paediatric-type high-grade glioma, H3-wildtype and IDH-wildtype | 0.66 | Diffuse paediatric-type high grade glioma, rtk1 subtype                                       | 0.64 | Diffuse paediatric-type high grade glioma, rtk1 subtype, subclass a (novel)                 | 0.50 |
| 5       | HGG NOS                                   | Adult-type diffuse gliomas                           | 0.32 | Glioblastoma, IDH-wildtype                                              | 0.29 | High-grade diffuse glioma of the midline/posterior fossa:H3/IDH-wildtype                      | 0.21 | Glioblastoma, IDH-wildtype, subtype posterior fossa (novel)                                 | 0.21 |
| 6       | Diffuse midline glioma, H3-K27M altered   | Paediatric-type diffuse high-grade gliomas           | 0.61 | Diffuse midline glioma, H3K27-altered                                   | 0.54 | Diffuse midline glioma, H3 K27-mutant/ EZHIP overexpressing                                   | 0.53 | Diffuse midline glioma, H3 K27-altered, subtype H3 K27-mutant or EZHIP expressing           | 0.53 |
| 7       | Diffuse hemispheric glioma, H3 G34-mutant | Paediatric-type diffuse high-grade gliomas           | 0.51 | Diffuse paediatric-type high-grade glioma, H3-wildtype and IDH-wildtype | 0.50 | Diffuse hemispheric glioma, H3 G34-mutant                                                     | 0.44 | Diffuse hemispheric glioma, H3 G34-mutant                                                   | 0.44 |
| 8       | IHG                                       | Paediatric-type diffuse high-grade gliomas           | 0.82 | Diffuse paediatric-type high-grade glioma, H3-wildtype and IDH-wildtype | 0.77 | Diffuse paediatric-type high grade glioma, rtk1 subtype                                       | 0.76 | Diffuse paediatric-type high grade glioma, rtk1 subtype, subclass a (novel)                 | 0.49 |
| 9       | Highly malignant tumor NOS                | Paediatric-type diffuse high-grade gliomas           | 0.53 | Diffuse paediatric-type high-grade glioma, H3-wildtype and IDH-wildtype | 0.51 | Diffuse paediatric-type high grade glioma, H3 wildtype and IDH wild type, Subtype A&B (novel) | 0.17 | Diffuse paediatric-type high grade glioma, H3 wildtype and IDH wild type, Subtype A (novel) | 0.17 |
| 10      | CPC                                       | Choroid plexus tumours                               | 0.82 | Choroid plexus tumours                                                  | 0.82 | Choroid plexus carcinoma                                                                      | 0.81 | Choroid plexus carcinoma, adult subtype (novel)                                             | 0.81 |
| 11      | AT/RT                                     | Other CNS embryonal tumours                          | 0.73 | Atypical teratoid rhabdoid tumour                                       | 0.70 | Atypical teratoid rhabdoid tumour, SHH activated                                              | 0.60 | Atypical teratoid/rhabdoid tumour, SHH-subtype                                              | 0.60 |
| 12      | Ewing tumor with CIC::DUX fusion          | NA                                                   | NA   | NA                                                                      | NA   | NA                                                                                            | NA   | Glioblastoma, idh-wildtype, mesenchymal subtype, subclass b (novel)                         | 0.10 |
| 13      | Unclassifiable                            | Paediatric-type diffuse high-grade gliomas           | 0.72 | Diffuse paediatric-type high-grade glioma, H3-wildtype and idh-wildtype | 0.71 | Diffuse paediatric-type high grade glioma, mycn subtype                                       | 0.67 | Diffuse paediatric-type high grade glioma, mycn subtype                                     | 0.67 |
